# Supplementary material
Source: publisher site journal article supplement (https://www.dovepress.com/article/211574)
Supplement: Supplementary file 1 [file get_supplementary_file.php]

**Supplementary Material**

**Supplementary Table 1** Objective parameters of sleep (General PSG)

|  | **Night 1** | **Night 2** | **Both Nights** |
| --- | --- | --- | --- |
| Total Sleep Timea  Patients  Controls | 6:29:59 (1:13:40)  6:43:10 (1:12:22) | 6:10:15 (0:54:21)  7:05:16 (0:54:03) | 6:20:07 (1:04:40)  6:54:13 (1:04:02) |
| Both Groups | 6:36:35 (1:12:23) | 6:37:45 (1:00:19) | 6:37:10 (1:06:12) |
| Sleep Efficiency (%)  Patients  Controls | 89.07 (8.22)  91.17 (12.89) | 86.57 (10.82)  93.92 (5.37) | 87.82 (9.57)  92.54 (9.85) |
| Both Groups | 90.12 (10.72) | 90.24 (9.22) | 90.18 (1.11) |
| Sleep Onset Latencya  Patients  Controls | 0:24:52 (0:46:24)  0:12:00 (0:11:10) | 0:16:33 (0:12:41)  0:12:22 (0:12:34) | 0:20:43 (0:33:50)  0:12:11 (0:11:44) |
| Both Groups | 0:18:26 (0:33:56) | 0:14:28 (0:12:39) | 0:16:27 (0:25:31) |
| Sleep Onset Latency (%)  Patients  Controls | 10.12 (27.62)  3.47 (4.00) | 4.82 (4.32)  3.01 (3.10) | 7.47 (19.70)  3.24 (3.54) |
| Both Groups | 6.80 (19.77) | 3.91 (3.82) | 5.35 (14.22) |
| Time Awakea  Patients  Controls | 1:08:48 (1:00:07)  0:49:29 (1:05:39) | 1:14:15 (0:56:21)  0:37:32 (0:28:08) | 1:11:31 (0:57:34)  0:43:31 (0:50:13) |
| Both Groups | 0:59:08 (1:02:54) | 0:55:54 (0:47:44) | 0:57:31 (0:55:30) |
| Time Awake (%)  Patients  Controls | 22.39 (31.68)  16.59 (35.56) | 21.81 (19.44)  9.04 (7.17) | 22.10 (25.94)  12.82 (25.61) |
| Both Groups | 19.49 (33.37) | 15.42 (15.84) | 17.46 (26.03) |
| Nb. Of Awakenings  Patients  Controls | 11.95 (5.31)  10.75 (7.09) | 11.20 (6.12)  9.40 (5.00) | 11.58 (5.67)  10.08 (6.09) |
| Both Groups | 11.35 (6.21) | 10.30 (5.59) | 10.83 (5.89) |

**Notes:**Results are presented as *M* (*SD*); a hours, minutes, seconds.

**Supplementary Table 2** Objective parameters of sleep (Sleep Stage Specific PSG)

|  | **Night 1** | **Night 2** | **Both Nights** |
| --- | --- | --- | --- |
| Duration Stage 1a  Patients  Controls | 0:18:55 (0:08:42)  0:24:32 (0:13:12) | 0:16:30 (0:10:20)  0:20:16 (0:11:50) | 0:17:42 (0:09:30)  0:22:24 (0:12:33) |
| Both Groups | 0:21:43 (0:11:24) | 0:18:23 (0:11:08) | 0:20:03 (0:11:19) |
| Duration Stage 1 (%)  Patients  Controls | 4.77 (1.95)  6.41 (4.25) | 4.46 (2.66)  4.82 (2.92) | 4.61 (2.31)  5.62 (3.69) |
| Both Groups | 5.59 (3.37) | 4.64 (2.76) | 5.11 (3.10) |
| Duration Stage 2a  Patients  Controls | 3:55:25 (0:54:22)  3:56:53 (0:59:36) | 3:29:00 (0:47:25)  4:08:13 (0.50:50) | 3:42:12 (0:52:05)  4:02:33 (0:54:59) |
| Both Groups | 3:56:09 (0:56:19) | 3:48:37 (0:52:25) | 3:52:23 (0:54:11) |
| Duration Stage 2 (%)  Patients  Controls | 60.74 (9.56)  58.58 (8.81) | 56.24 (8.63)  58.02 (6.96) | 58.49 (9.27)  58.30 (7.84) |
| Both Groups | 59.67 (9.14) | 57.13 (7.79) | 58.40 (8.53) |
| Duration REMa  Patients  Controls | 1:15:22 (0:33:30)  1:15:31 (0:27:07) | 1:20:33 (0:23:42)  1:31:10 (0:21:30) | 1:17:57 (0:28:46)  1:23:21 (0:25:25) |
| Both Groups | 1:15:26 (0:30:05) | 1:25:51 (0:22:58) | 1:20:39 (0:27:06) |
| Duration REM (%)  Patients  Controls | 19.07 (7.36)  18.86 (5.86) | 21.74 (5.55)  21.64 (5.26) | 20.41 (6.57)  20.25 (5.67) |
| Both Groups | 18.97 (6.567) | 21.69 (5.33) | 20.33 (6.10) |
| Duration SWSa  Patients  Controls | 1:00:16 (0:25:57)  1:04:48 (0:30:39) | 1:04:13 (0:30:50)  1:05:36 (0:27:50) | 1:02:15 (0:28:12)  1:05:12 (0:28:54) |
| Both Groups | 1:02:32 (0:28:08) | 1:04:54 (0:29:00) | 1:03:43 (0:28:25) |
| Duration SWS(%)  Patients  Controls | 15.41 (6.69)  15.86 (6.93) | 17.57 (9.11)  15.52 (6.66) | 16.49 (7.97)  15.69 (6.71) |
| Both Groups | 15.63 (6.73) | 16.54 (7.95) | 16.09 (7.33) |

**Notes:** Results are presented as *M* (*SD*); a hours, minutes, seconds.

**Supplementary Table 3** Subjective parameters of sleep

|  | **Night 1** | **Night 2** | **Both Nights** |
| --- | --- | --- | --- |
| Moodb  Patients  Controls | 3.45 (1.15)  4.56 (1.10) | 3.61 (1.02)  4.50 (1.10) | 3.53 (1.07)  4.53 (1.09) |
| Both Groups | 4.00 (1.24) | 4.06 (1.13) | 4.03 (1.18) |
| Freshnessc  Patients  Controls | 2.90 (1.07)  3.52 (0.99) | 2.87 (0.88)  3.75 (1.25) | 2.89 (0.97)  3.63 (1.12) |
| Both Groups | 3.21 (1.07) | 3.31 (1.16) | 3.26 (1.11) |
| Tensiond  Patients  Controls | 3.41 (1.00)  4.46 (0.94) | 3.53 (1.07)  4.60 (1.05) | 3.47 (1.02)  4.53 (0.99) |
| Both Groups | 3.93 (1.10) | 4.07 (1.18) | 4.00 (1.13) |
| Restfulness of Sleepe  Patients  Controls | 2.80 (1.06)  3.30 (1.03) | 2.69 (0.75)  3.55 (0.89) | 2.73 (0.91)  3.43 (0.96) |
| Both Groups | 3.05 (1.06) | 3.10 (0.93) | 3.08 (1.00) |

**Notes:** Results are presented as *M* (*SD*); b mood, ranging from “1: depressed” to “6: untroubled”; c freshness, ranging from “1: run down” to “6: refreshed”; d tension, ranging from “1: tense” to “6: relaxed”; e restfulness, ranging from “1: not restful at all” to “5: very restful”.
